# Supplementary material for: Which environmental factors most strongly influence a street’s appeal for bicycle transport among adults? A conjoint study using manipulated photographs
Source: PubMed Central journal article supplement (PMC5007833; doi:10.1186/s12942-016-0058-4), 2016-09-01
Supplement: 12942_2016_58_MOESM1_ESM.pdf [file 12942_2016_58_MOESM1_ESM.pdf]

## Additional file 1 - Interaction effect between cycle path type and speed limit

Table A.1. Interaction effect between type of cycle path and speed limit (chi-square= 16.87; p=0.005)

|                | <b>C1</b> |         | <b>C2</b> |         | <b>C3</b> |         |
|----------------|-----------|---------|-----------|---------|-----------|---------|
|                | 50km/h    | 30 km/h | 50km/h    | 30 km/h | 50km/h    | 30 km/h |
| <b>MEAN</b>    | 0.00      | 4.11    | 10.19     | 12.71   | 13.56     | 16.00   |
| <b>SD</b>      | 0.00      | 0.18    | 0.45      | 0.56    | 0.60      | 0.71    |
| <b>-95% CI</b> | 0.00      | 3.93    | 9.74      | 12.15   | 12.96     | 15.29   |
| <b>+95% CI</b> | 0.00      | 4.29    | 10.64     | 13.28   | 14.17     | 16.71   |
|                | <b>C4</b> |         | <b>C5</b> |         | <b>C6</b> |         |
|                | 50km/h    | 30 km/h | 50km/h    | 30 km/h | 50km/h    | 30 km/h |
| <b>MEAN</b>    | 18.70     | 20.98   | 15.28     | 17.27   | 19.71     | 21.08   |
| <b>SD</b>      | 0.83      | 0.93    | 0.68      | 0.77    | 0.87      | 0.94    |
| <b>-95% CI</b> | 17.87     | 20.05   | 14.60     | 16.50   | 18.83     | 20.15   |
| <b>+95% CI</b> | 19.53     | 21.91   | 15.96     | 18.03   | 20.58     | 22.02   |

C1: no cycle path; C2: cycle path separated from traffic by marked white lines; C3: cycle path separated from traffic with a curb, not separated from walking path by color; C4: cycle path separated from traffic with a hedge, not separated from walking path by color; C5: cycle path separated from traffic with a curb, separated from walking path by color; C6: cycle path separated from traffic with a hedge, separated from walking path by color.
