# Supplementary material for: Which environmental factors most strongly influence a street’s appeal for bicycle transport among adults? A conjoint study using manipulated photographs
Source: PubMed Central journal article supplement (PMC5007833; doi:10.1186/s12942-016-0058-4), 2016-09-01
Supplement: 12942_2016_58_MOESM2_ESM.pdf [file 12942_2016_58_MOESM2_ESM.pdf]

## Additional file 2 - Interaction effect between cycle path type and vegetation

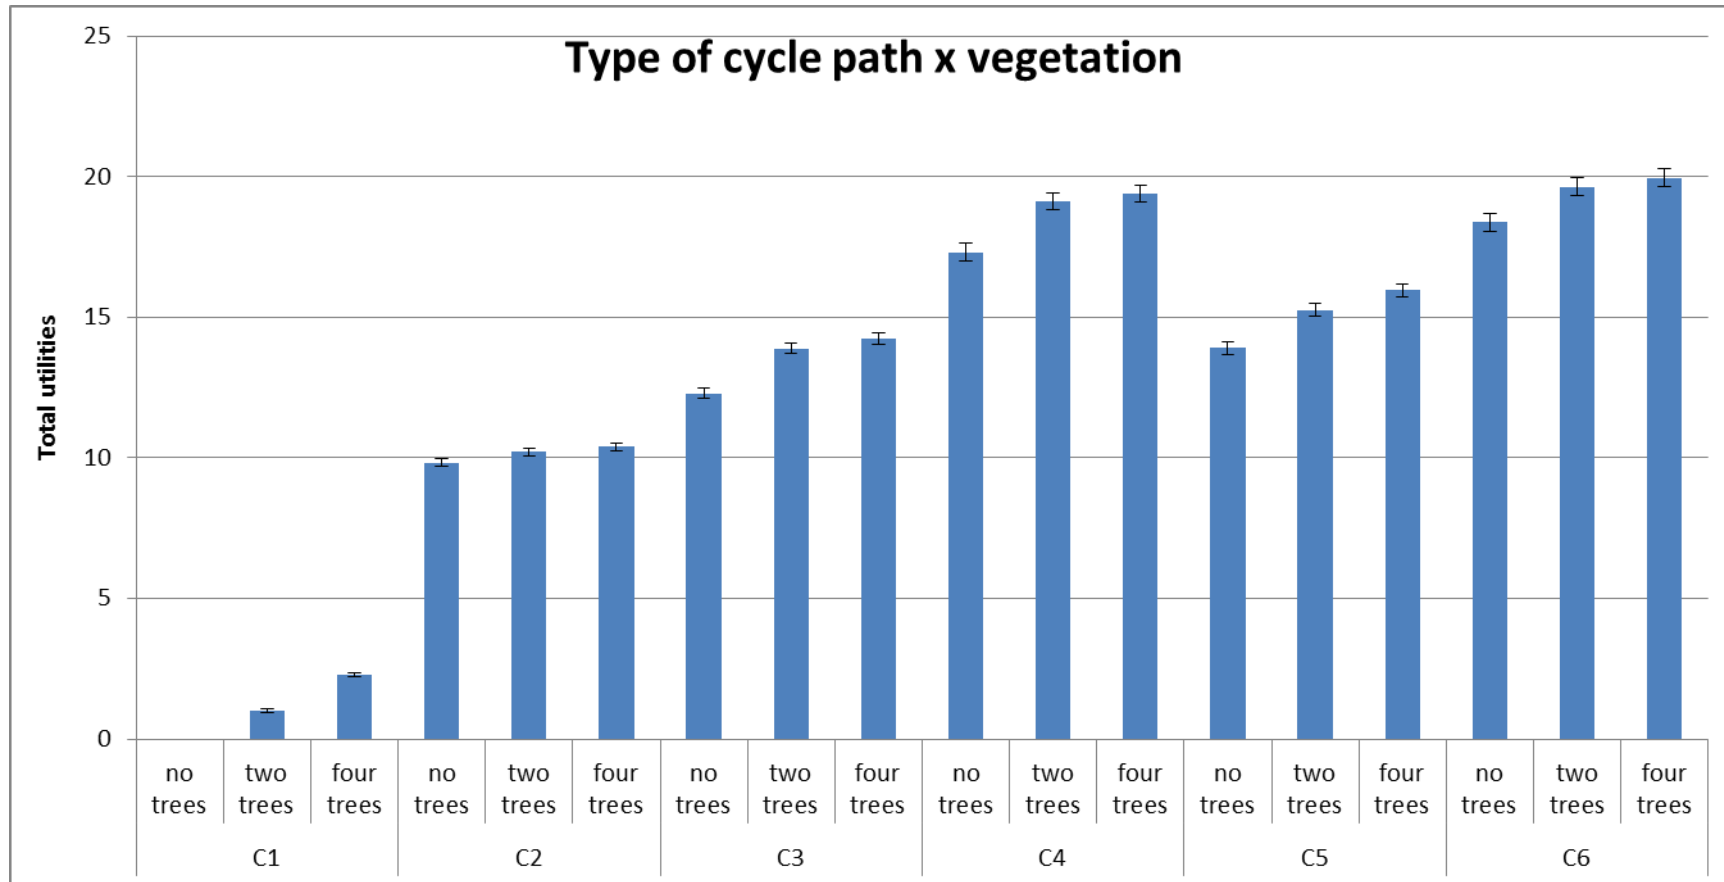

Figure B.1. Interaction effect between type of cycle path and vegetation ( $\chi^2 = 27.78$ ;  $p = 0.002$ )

Table B.1. Interaction effect between type of cycle path and vegetation (chi-square= 27.78; p=0.002)

|         | C1       |           |            | C2       |           |            | C3       |           |            | C4       |           |            | C5       |           |            | C6       |           |            |
|---------|----------|-----------|------------|----------|-----------|------------|----------|-----------|------------|----------|-----------|------------|----------|-----------|------------|----------|-----------|------------|
|         | no trees | two trees | four trees | no trees | two trees | four trees | no trees | two trees | four trees | no trees | two trees | four trees | no trees | two trees | four trees | no trees | two trees | four trees |
| MEAN    | 0.00     | 1.00      | 2.30       | 9.83     | 10.22     | 10.39      | 12.30    | 13.90     | 14.24      | 17.30    | 19.12     | 19.39      | 13.91    | 15.26     | 15.96      | 18.37    | 19.64     | 19.96      |
| SD      | 0.00     | 1.54      | 1.71       | 3.09     | 3.02      | 2.80       | 4.32     | 4.25      | 4.60       | 7.08     | 6.88      | 6.85       | 5.03     | 4.97      | 5.14       | 7.45     | 6.98      | 7.10       |
| -95% CI | 0.00     | 0.94      | 2.23       | 9.69     | 10.08     | 10.27      | 12.11    | 13.71     | 14.04      | 16.99    | 18.82     | 19.09      | 13.69    | 15.04     | 15.73      | 18.04    | 19.33     | 19.64      |
| +95% CI | 0.00     | 1.07      | 2.38       | 9.97     | 10.35     | 10.52      | 12.49    | 14.09     | 14.44      | 17.62    | 19.43     | 19.69      | 14.13    | 15.48     | 16.19      | 18.70    | 19.95     | 20.27      |

C1: no cycle path; C2: cycle path separated from traffic by marked white lines; C3: cycle path separated from traffic with a curb, not separated from walking path by color; C4: cycle path separated from traffic with a hedge, not separated from walking path by color; C5: cycle path separated from traffic with a curb, separated from walking path by color; C6: cycle path separated from traffic with a hedge, separated from walking path by color.
