# Supplementary material for: Which environmental factors most strongly influence a street’s appeal for bicycle transport among adults? A conjoint study using manipulated photographs
Source: PubMed Central journal article supplement (PMC5007833; doi:10.1186/s12942-016-0058-4), 2016-09-01
Supplement: 12942_2016_58_MOESM5_ESM.pdf [file 12942_2016_58_MOESM5_ESM.pdf]

## Additional file 5 - Interaction effect between speed bump and traffic density

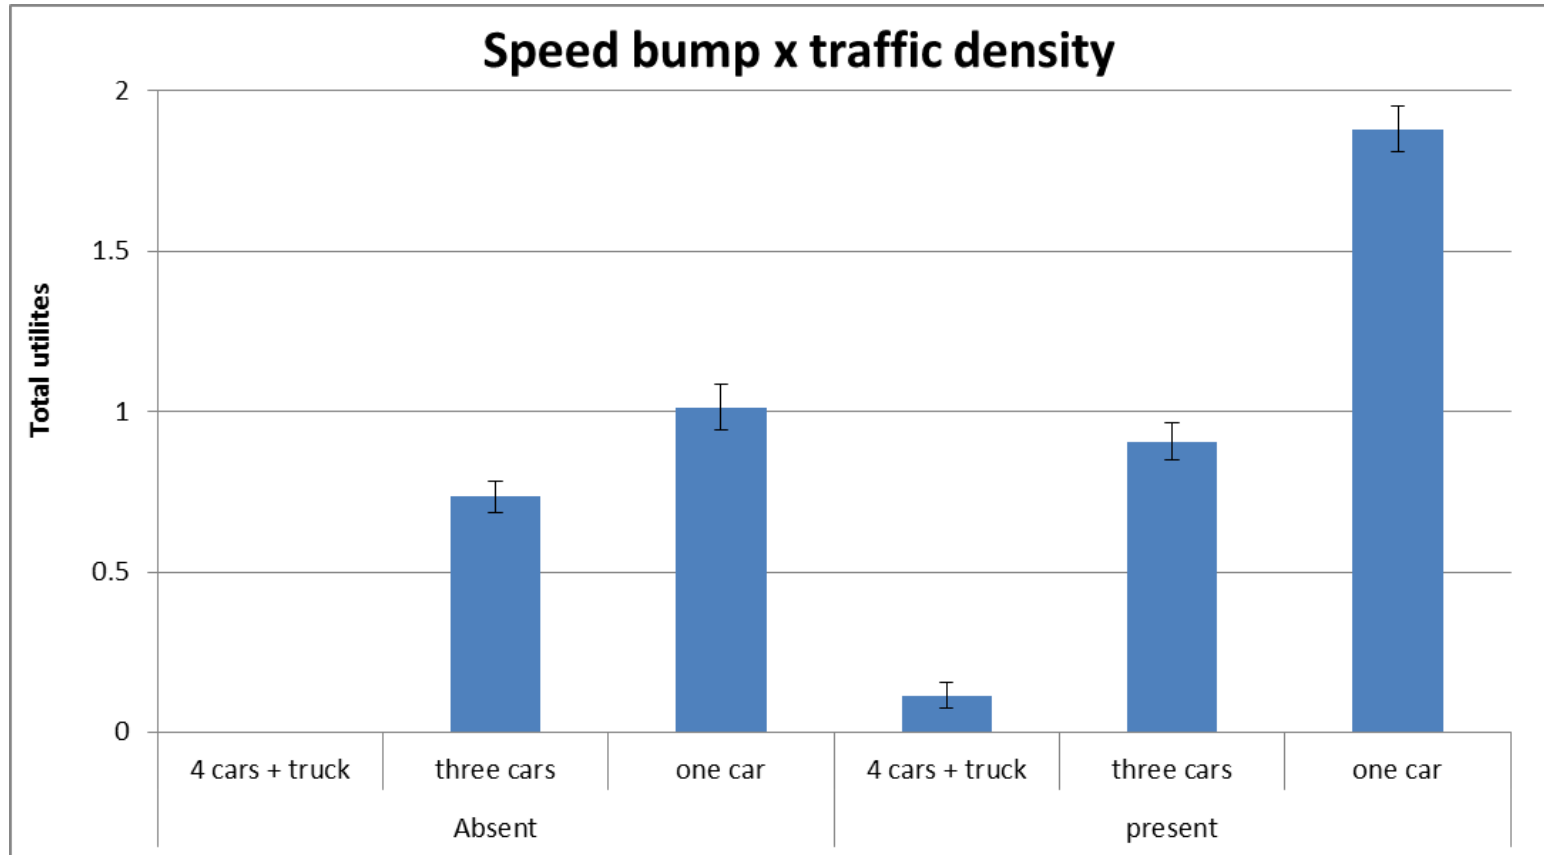

Figure E.1. Interaction effect between speed bump and traffic density

*Table E.1. Interaction effect between speed bump and traffic density*

|         | Absent         |            |         | Present        |            |         |
|---------|----------------|------------|---------|----------------|------------|---------|
|         | 4 cars + truck | three cars | one car | 4 cars + truck | three cars | one car |
| MEAN    | 0.00           | 0.73       | 1.01    | 0.11           | 0.91       | 1.88    |
| SD      | 0.00           | 1.13       | 1.65    | 0.89           | 1.29       | 1.61    |
| -95% CI | 0.00           | 0.68       | 0.94    | 0.08           | 0.85       | 1.81    |
| +95% CI | 0.00           | 0.78       | 1.09    | 0.15           | 0.96       | 1.95    |
