# Supplementary material for: Which environmental factors most strongly influence a street’s appeal for bicycle transport among adults? A conjoint study using manipulated photographs
Source: PubMed Central journal article supplement (PMC5007833; doi:10.1186/s12942-016-0058-4), 2016-09-01
Supplement: 12942_2016_58_MOESM6_ESM.pdf [file 12942_2016_58_MOESM6_ESM.pdf]

**Additional file 6 - Interaction effect between vegetation and general upkeep**

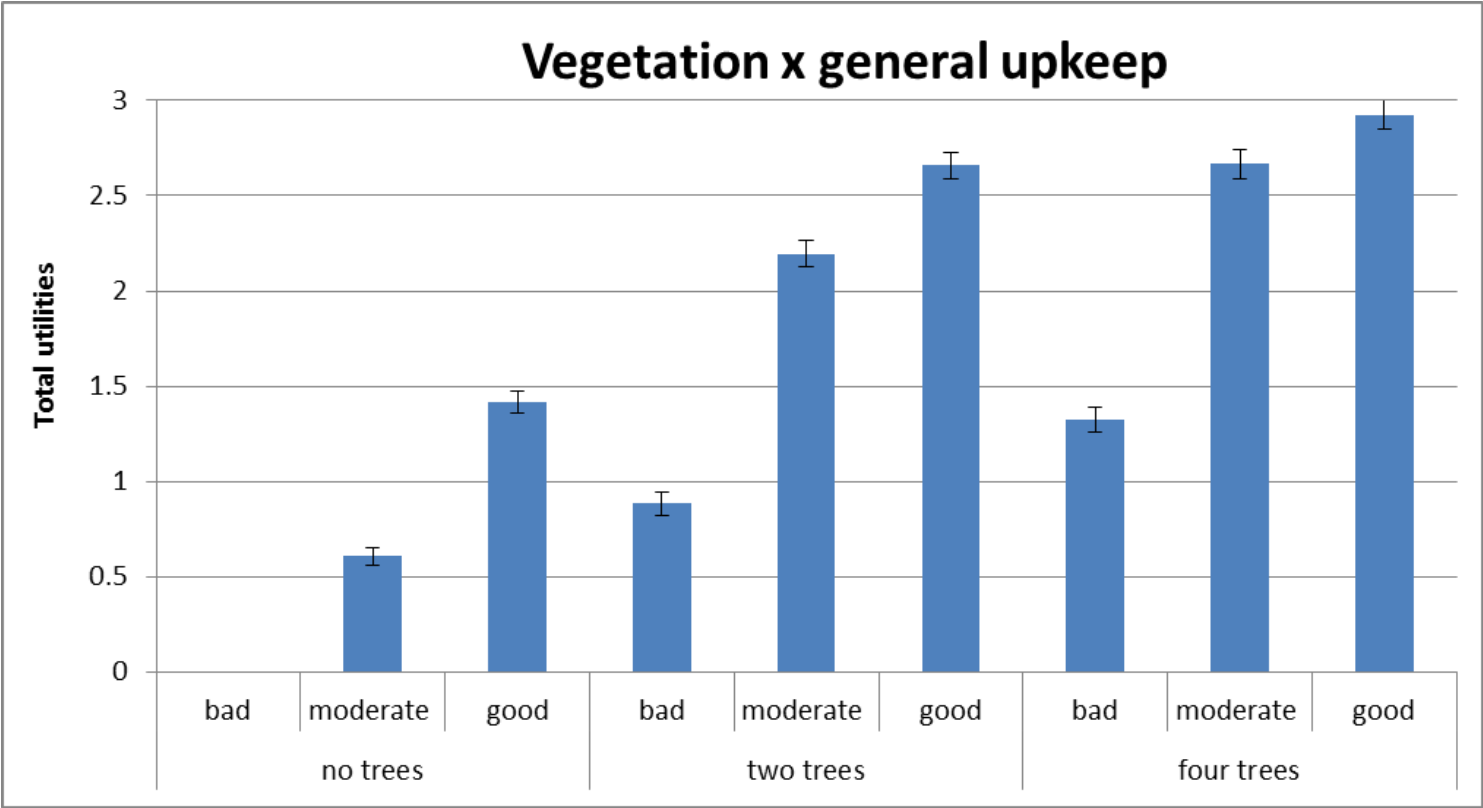

*Figure F.1. Interaction effect between vegetation and general upkeep*

*Table F.1. Interaction effect between vegetation and general upkeep*

|         | no trees |          |      | two trees |          |       | four trees |          |       |
|---------|----------|----------|------|-----------|----------|-------|------------|----------|-------|
|         | bad      | moderate | good | bad       | moderate | good  | bad        | moderate | Good  |
| MEAN    | 0.00     | 0.60     | 1.42 | 0.88      | 2.20     | 2.66  | 1.32       | 2.67     | 2.93  |
| SD      | 0.00     | 1.09     | 1.32 | 1.32      | 1.50     | 1.54  | 1.45       | 1.74     | 1.72  |
| -95% CI | 0.00     | 0.56     | 1.36 | 0.82      | 2.13     | 2.59  | 1.26       | 2.59     | 2.85  |
| +95% CI | 0.00     | 0.00     | 1.48 | -0.29     | -2.67    | -3.54 | -1.02      | 2.75     | -3.87 |
